1 **Identifying High Priority Ethical Challenges for Precision Emergency Medicine - A**  
2 **Nominal Group Study**

3  
4  
5 Authors: Christian Rose, MD 1; Emily Shearer, MD 2; Isabela Woller 3; Ashley Foster,  
6 MD 4; Nicholas Ashenburg, MD 1; Ireh L. Kim 1; Jennifer Newberry, MD/JD/MS 1

7  
8  
9 Affiliations:

- 10 1) Department of Emergency Medicine, Stanford University School of Medicine  
11 2) Department of Emergency Medicine, Alpert School of Medicine at Brown  
12 University  
13 3) Loyola University Chicago  
14 4) Department of Emergency Medicine, University of California, San Francisco

15  
16 Corresponding author:

17 Christian Rose

18 ccrose@stanford.edu

19  
20 Running title:

21 Ethical Challenges for Precision Emergency Medicine

22  
23 Financial support:

## Ethical Considerations for Precision Emergency Medicine

24 Research made possible thanks in part to a generous seed grant from Stanford

25 University's McCoy Family Center for Ethics in Society - Ethics, Society, and

26 Technology Hub Seed Grant.

27

28 Conflicts of interest:

29 No relevant conflicts of interest to declare.

30

31 Word count: 3360

32

33 Author contribution statement:

34 CR, JN, ES, IK conceived of, designed, and completed the research. CR and JN

35 obtained research funding. AF, NA performed data analysis. CR, JN drafted the

36 manuscript, IK, IW contributed to manuscript development and all authors contributed

37 substantially to manuscript editing. CR takes responsibility for the work as a whole.

38

## Ethical Considerations for Precision Emergency Medicine

### 39 Abstract

#### 40 OBJECTIVE:

41 Precision medicine is a rapidly progressing avenue to providing the right care to the  
42 right patient at the right time and spans all medical fields and specialties. However,  
43 given its reliance on computation and timely, accurate information, actualizing precision  
44 medicine within the emergency department and its “anyone, anywhere, anytime”  
45 approach presents unique challenges which could exacerbate disparities rather than  
46 improve care.

47

#### 48 METHODS:

49 We performed a qualitative, nominal group technique study of emergency physicians  
50 with prior knowledge of precision medicine concepts to identify high priority ethical  
51 concerns facing the implementation of precision medicine in the emergency department.

52

#### 53 RESULTS:

54 Twelve emergency physicians identified 91 ethical concerns which were organized into  
55 a framework with three major themes: values, privacy, and justice. The framework  
56 identified the need to address these themes across three time points of the precision  
57 medicine process: acquisition of data, actualization in the care setting, and after effects  
58 of its use.

59

#### 60 CONCLUSIONS:

## Ethical Considerations for Precision Emergency Medicine

61 Precision medicine may help to improve the quality of care provided in the emergency  
62 department, but significant hurdles exist. Our framework helps to identify high-yield  
63 ethical concerns that could serve as focus areas for future research and policy in order  
64 to guide the effective implementation of precision medicine in the emergency  
65 department.

## 66 Introduction

67  
68 Historically, medical treatments have been tailored to the average patient. However, few  
69 individuals look or feel like the average patient—each has their own risk factors, needs,  
70 and ideal outcomes. Precision medicine aims to address this problem by moving from a  
71 one-size-fits-all model toward one of providing the “right care to the right person at the  
72 right time” through the use of big data like genetics and wearable technologies.<sup>1–5</sup>  
73 However, even the most advanced, targeted therapies are limited by biases that already  
74 exist in the US healthcare system.<sup>6,7</sup> Differential care, even when “evidence based”, can  
75 result in worsened gaps between the haves and the have-nots, disproportionately  
76 burdening already marginalized communities.<sup>8</sup> For emergency physicians, who serve in  
77 the safety net for American healthcare, precision medicine’s “right care, right patient,  
78 right time” must be balanced with our “anyone, anywhere, any time” mantra and the  
79 practical and ethical challenges that this setting presents.

80  
81 To date, most precision medicine initiatives have focused on the utilization of genetics  
82 to better understand or treat diseases. Much has been made of determining the right  
83 medication for the right person (e.g., warfarin dosing for those with a CYP mutation) or  
84 when to start cancer screening based on genetic profiles (e.g., colorectal screening for  
85 CHD1).<sup>9</sup> It has become clear, however, that genetics alone cannot explain much of the  
86 variation in outcomes across the population.<sup>2,10</sup> The effect of behavioral factors like diet  
87 and exercise have been well-established, and studies have also begun to illuminate the  
88 effect of social and environmental determinants of health like access to healthcare  
89 resources or housing, which may be responsible for over half of health outcomes.<sup>11,12</sup>

## Ethical Considerations for Precision Emergency Medicine

90 As such, there has been a broadening approach to precision medicine that does not rely  
91 solely on genetics, but also home monitoring, social media and social networks, as well  
92 as patient-generated data like diet, daily steps, exercise, or heart rate variability.<sup>13,14</sup>

93  
94 While useful when available, not all patients can afford these tools and services.  
95 Furthermore, “precise” treatments rely on the accuracy of this data, which must be built  
96 into data sets and shared. Few comprehensive data sets that incorporate all of these  
97 data exist, and even fewer have been carefully evaluated for missing or inaccurate data  
98 which could bias results.<sup>15</sup> Current data sets suffer from a lack of representation from  
99 some populations while simultaneously over-representing chronically-ill patients or  
100 those presenting to research institutions.<sup>16</sup> Data that were collected where patients are  
101 provided differential care might inadvertently support antiquated practices<sup>17-21</sup> due to  
102 the association of outcomes with variables like the ability to pay for a higher level of  
103 care. Though precision approaches aim to limit quality gaps and provide more equitable  
104 care, decisions that are made without the full picture of their context might inadvertently  
105 exacerbate systemic biases.<sup>7</sup>

106  
107 The emergency department setting offers additional unique hurdles for the growth of  
108 precision medicine. Little patient-generated data are readily available at the point of  
109 care. Highly important features like code status are haphazardly available among the  
110 sickest patients. Nevertheless, emergency care providers strive to provide better care,  
111 and to actualize the benefits of a truly learning healthcare system. How can this safety  
112 net, responsible for a growing and significant portion of acute care in America,<sup>22,23</sup> begin

## Ethical Considerations for Precision Emergency Medicine

113 to approach the problems that inherent to the implementation of precision medicine so  
114 that it might offer real-time, equitable care for patients with the widest spectrum of  
115 disease in medicine and a microcosm of the healthcare system?

116

117 Given the continued growth yet limited scope of precision medicine in the emergency  
118 department, our primary goal was to identify themes and gaps in current research by  
119 using a rigorous consensus technique to identify ethical questions and concerns of  
120 precision medicine relevant to emergency medicine practice. This manuscript presents  
121 the resulting consensus framework.

## Ethical Considerations for Precision Emergency Medicine

### 122 Methods

123  
124 *Study Design and Setting:* We employed a modified nominal group technique (NGT), a  
125 consensus methodology widely used in emergency medicine, to identify high priority  
126 research questions relevant to the implementation of precision medicine in the  
127 emergency medicine setting and arrive at a consensus framework.<sup>24–31</sup>

128  
129 NGT is a four-step process in which stakeholders generate and then prioritize research  
130 ideas (Figure 1). NGT was well-suited for our research question as our aim was to  
131 generate a comprehensive set of ethical questions and concerns which could then be  
132 organized and ordered. This is in contrast to other frequently used consensus  
133 techniques such as the Delphi technique, which are designed instead to reach a  
134 consensus opinion on one particular question.<sup>24</sup> NGT has previously been used  
135 successfully to identify research priorities in the field of Emergency Medicine.<sup>25,27,32–35</sup>

136

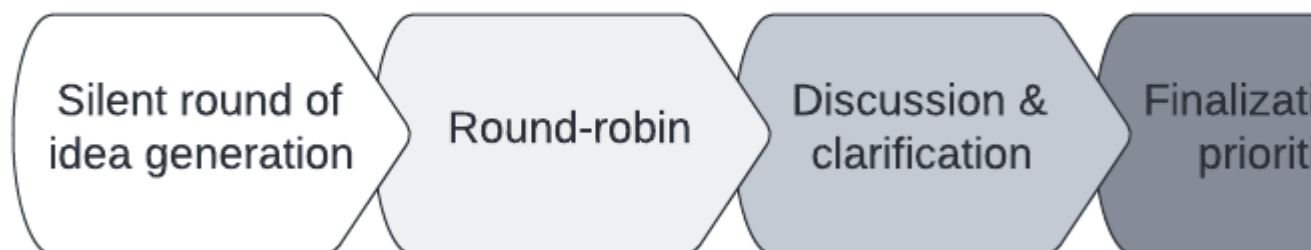

137

138



## Ethical Considerations for Precision Emergency Medicine

139 Figure 1: Flow chart of the NGT process.

140

141 *Selection and Participants:* The ideal NGT session group size is greater than six - with  
142 the ideal between nine and twelve - participants,<sup>32</sup> with the ideal between nine and  
143 twelve.<sup>32</sup> Participants were recruited via email to the Society of Academic Medicine  
144 Ethics Committee listserv; the email invitation also asked recipients for referral and  
145 sharing to others who may be interested. A convenience sample of the first fourteen  
146 respondents to the email were registered as potential participants in the NGT group to  
147 meet the ideal group size and allow for scheduling conflicts. Ultimately, twelve  
148 emergency medicine physicians with working knowledge of precision medicine topics  
149 joined our NGT session. Participants represented a spectrum of sub-specialties  
150 (education, ethics, pediatrics, diversity, equity, and inclusion, and informatics) across  
151 various stages of training (resident, early-, mid- and late-career) and practice settings  
152 (county hospital, community hospital, academic center, and integrated managed care  
153 consortium) (Appendix 1) in order to provide a range of emergency medicine practice  
154 perspectives.

155

156 Participants took part in the NGT session during the American College of Emergency  
157 Physicians annual conference in Boston, October of 2021. The process was moderated  
158 by the lead researcher of the group (CR), and notes were taken by two separate  
159 researchers (ES and MG).

160

161

## Ethical Considerations for Precision Emergency Medicine

162 *NGT Process*

163

164 *Phase 1: Silent idea generation.*

165 The first step of NGT is a round of silent idea generation. In this phase, after being  
166 given an initial prompt, participants silently write down what they believe to be high  
167 priority topics or concerns. It is imperative that this phase is silent, as this allows each  
168 member of the group to write their initial thoughts without influence from other members.  
169 Our prompt asked participants to identify what they thought were priority research topics  
170 for the implementation of precision medicine initiatives in the emergency medicine  
171 setting.

172

173 *Phase 2: Round-robin.*

174 After individual idea generation, participants then shared their ideas with the group in a  
175 round-robin format. NGT has the advantage of not allowing any one particular voice to  
176 outweigh others, by asking each participant to share their complete list of ideas in-turn  
177 during the round robin phase, rather than ad-hoc discussion, thus minimizing potential  
178 bias.<sup>36,37</sup>

179

180 *Phase 3: Discussion and clarification.*

181 After the round-robin format, participants undertook a 30-minute discussion and  
182 clarification of topics. In this phase, participants were encouraged to ask other members  
183 for clarification of topics generated as needed. Cross-cutting themes were identified,

## Ethical Considerations for Precision Emergency Medicine

184 and duplicate topics consolidated. Key topics were then placed on moveable cards for  
185 prioritization and further thematic grouping.

186

187 *Phase 4: Finalization of research priorities.*

188 Lastly, participants finalized the topics they believed represented priority areas for

189 research. In traditional NGT, this is the ranking phase, where members are allocated

190 votes to generate a ranked list of research priorities. Instead, participants categorized

191 concerns by overarching themes and came to consensus on those distinctions.

## 192 Results

193 During phases one and two of the NGT process, 82 questions were generated  
194 (Complete list in Appendix 2) with the average participant contributing 6.8 (+/- 2.9)  
195 questions. After refinement and separation of cross-cutting themes and consolidation of  
196 duplicate topics in phase three, a list of 68 final questions were retained.  
197 In phase four, those questions were mapped into common thematic realms based on  
198 the nature of the ethical issue and where in the precision medicine process the issue  
199 was likely to occur (Tables 1-3). The result of this mapping was a 3 by 3 matrix  
200 consisting of ethical concerns grouped into the domains of values, privacy and justice  
201 as related to their temporal relationship to the precision medicine process, specifically in  
202 the acquisition of data, the actualization of precision medicine in practice, and the after-  
203 effects of the process (Figure 2). This matrix represents the product of our expert panel  
204 consensus.

205  
206

| <b>VALUES</b>                                                                       |
|-------------------------------------------------------------------------------------|
| <i>Acquisition</i>                                                                  |
| What if individuals identify differently from measures used in precision medicine?  |
| How accurate is the medical record in representing the individual?                  |
| Should individuals worry about the impact of family history/genetic predisposition? |
| How much does lifestyle matter?                                                     |
| How will social determinants of health be evaluated?                                |
| How do we decide what disease conditions to study and treat?                        |
| Can we mitigate the mistrust of people/system?                                      |

## Ethical Considerations for Precision Emergency Medicine

|                                                                                                                                              |
|----------------------------------------------------------------------------------------------------------------------------------------------|
| How do we present precision medicine in a way that everyone can understand?                                                                  |
| What do we do if healthcare providers have judgements and values that may conflict with patients' judgements and values?                     |
| How accurate will the obtained demographic information be?                                                                                   |
| How are genetic risk factors versus modifiable or behavioral risk factors differentiated and how will this impact precision medicine care?   |
| <i>Actualization</i>                                                                                                                         |
| Is reducing our patients to a few factors harmful to the patient or the patient/physician relationship?                                      |
| How do we maintain humility as we learn more about genetics and epigenetics?                                                                 |
| How do we address patient choice?                                                                                                            |
| What prevents companies from researching the most common (lucrative) condition?                                                              |
| Will non-precision medicine be available to patients even with precision medicine?                                                           |
| How do we maintain patient choice in precision medicine?                                                                                     |
| Are patient values a major determinant? How do we measure this?                                                                              |
| Does how we utilize precision medicine change in an emergent scenario?                                                                       |
| Do patients get a choice in whether precision medicine is "right" for them?                                                                  |
| How do healthcare providers stay up-to-date with rapid changes in precision medicine?                                                        |
| How do we assign value to people's choices and how this impacts health?                                                                      |
| Would patients lose the power to make decisions about how to manage their own differences?                                                   |
| On a medical provider level, do we know how to interpret precision medicine data and does the interpretation change in an emergent scenario? |
| Is it possible that medical providers will anchor on past determinations (correctly or incorrectly)?                                         |
| How do we ensure provider comfort with using precision medicine?                                                                             |
| Does precision medicine capture the holistic patient experience?                                                                             |
| <i>After-effects</i>                                                                                                                         |
| What if we are wrong (precision medicine is wrong)?                                                                                          |
| Are there unintended psychological consequences?                                                                                             |
| How do we know that we are "getting it right" from a quality perspective?                                                                    |
| How do we ascribe value to different patient choices and the ways the choices impact their health care?                                      |

## Ethical Considerations for Precision Emergency Medicine

|                                                                                       |
|---------------------------------------------------------------------------------------|
| How do we ensure patient choice and preference is communicated between medical teams? |
|---------------------------------------------------------------------------------------|

207 Table 1: Participant concerns related to how the unique values of patients, providers, and the  
 208 healthcare system will be incorporated into precision medicine.  
 209

|                |
|----------------|
| <b>PRIVACY</b> |
|----------------|

|                    |
|--------------------|
| <i>Acquisition</i> |
|--------------------|

|                                                        |
|--------------------------------------------------------|
| Who will be accountable for the collected information? |
|--------------------------------------------------------|

|                                                                |
|----------------------------------------------------------------|
| How will genetic information be collected, stored, maintained? |
|----------------------------------------------------------------|

|                                                                                         |
|-----------------------------------------------------------------------------------------|
| How do we protect minors while ensuring appropriate data sharing with their caregivers? |
|-----------------------------------------------------------------------------------------|

|                                                               |
|---------------------------------------------------------------|
| How do we decide which of many possible variables to include? |
|---------------------------------------------------------------|

|                                                                                                        |
|--------------------------------------------------------------------------------------------------------|
| How do we include underrepresented or excluded groups in a way that avoids perception of surveillance? |
|--------------------------------------------------------------------------------------------------------|

|                      |
|----------------------|
| <i>Actualization</i> |
|----------------------|

|                                    |
|------------------------------------|
| How large of a concern is privacy? |
|------------------------------------|

|                                                                                                 |
|-------------------------------------------------------------------------------------------------|
| Will patients lose the power to make private decisions about how to manage their own situation? |
|-------------------------------------------------------------------------------------------------|

|                                                                    |
|--------------------------------------------------------------------|
| How will patients interface with additional personal medical data? |
|--------------------------------------------------------------------|

|                                                                                                                           |
|---------------------------------------------------------------------------------------------------------------------------|
| What happens with incidental findings and how does the medical community ensure appropriate follow-up for these findings? |
|---------------------------------------------------------------------------------------------------------------------------|

|                      |
|----------------------|
| <i>After-effects</i> |
|----------------------|

|                                                             |
|-------------------------------------------------------------|
| Can data be re-identified due to cohorting rare conditions? |
|-------------------------------------------------------------|

|                                                                                  |
|----------------------------------------------------------------------------------|
| What are the legal ramifications (i.e., at higher risk for medical malpractice)? |
|----------------------------------------------------------------------------------|

|                                                                      |
|----------------------------------------------------------------------|
| At what point does data sharing and access become a privacy concern? |
|----------------------------------------------------------------------|

|                           |
|---------------------------|
| Who owns the shared data? |
|---------------------------|

210 Table 2: Participant concerns regarding privacy in the precision medicine process.  
 211

|                |
|----------------|
| <b>JUSTICE</b> |
|----------------|

|                    |
|--------------------|
| <i>Acquisition</i> |
|--------------------|

|                                                                     |
|---------------------------------------------------------------------|
| Will some populations be oversampled while others are undersampled? |
|---------------------------------------------------------------------|

|                                                                   |
|-------------------------------------------------------------------|
| Will those who are historically excluded continue to be excluded? |
|-------------------------------------------------------------------|

|                                                                                               |
|-----------------------------------------------------------------------------------------------|
| Is variation in historic data due to patient phenotype or societal and environmental effects? |
|-----------------------------------------------------------------------------------------------|

|                                                                                        |
|----------------------------------------------------------------------------------------|
| How do we incorporate everyone into precision research (barriers to informed consent)? |
|----------------------------------------------------------------------------------------|

## Ethical Considerations for Precision Emergency Medicine

|                                                                                                            |
|------------------------------------------------------------------------------------------------------------|
| Can perception of different care still be equitable?                                                       |
| What are the disparities that would make it hard for patients to participate?                              |
| Should we be investing in precision medicine when many currently have no access to care?                   |
| Who is going to fund the research?                                                                         |
| How are precision medicine priorities determined (i.e., institutional level or government level)?          |
| What about patients who cannot pay for precision medicine?                                                 |
| <i>Actualization</i>                                                                                       |
| How do we build a relationship of trust with a patient in the ED?                                          |
| How do we keep the personalization in precision medicine?                                                  |
| How do we ensure data sharing can occur among differing institutions or electronic medical record systems? |
| How can we make precision medicine safe while also making it accessible?                                   |
| How do we prevent genetic predispositions from leading to biased care (i.e., genetic determinism)?         |
| <i>After-effects</i>                                                                                       |
| Will flawed data inputs result in flawed data outputs?                                                     |
| How do we make systems adaptable over time?                                                                |
| How does the medical system analyze implementation and ensure outcome is fed back into the system?         |
| Can we ensure precision medicine is equitable across all patient populations?                              |
| What systems need to be in place for error monitoring and reporting?                                       |
| Will who we decide to study and treat have unintended consequences?                                        |
| Will this further racist ideologies and marginalize patients?                                              |

212 Table 3: Participant concerns about how to ensure just care in the precision medicine model  
 213 and process.  
 214

## Ethical Considerations for Precision Emergency Medicine

|               | Values                                                      | Privacy                                                 | Justice                                            |
|---------------|-------------------------------------------------------------|---------------------------------------------------------|----------------------------------------------------|
|               | (Complete list in Table 1)                                  | (Complete list in Table 2)                              | (Complete list in Table 3)                         |
| Acquisition   | Who decides what to include in data sets?                   | How will data be collected and maintained?              | Will some populations be over- or under-sampled?   |
| Actualization | Do patients get to choose what treatment is right for them? | Will patients lose the power to make private decisions? | Will precision medicine be available to everyone?  |
| After-Effect  | Who determines if we made the right choice?                 | Can data be re-identified later?                        | Can we ensure equitable distribution of resources? |

215  
216 [Figure 2](#): Priority matrix of ethical concerns for precision medicine.  
217



## 218 Discussion

219  
220 Precision medicine research and practice in the emergency medicine context requires  
221 attention to the specific ethical concerns of those working in this space in order to avoid  
222 potential pitfalls and promote inclusion and equity. Working with a diverse group of  
223 emergency physicians, we used a modified NGT approach to identify critical areas in  
224 need of research at the intersection of emergency medicine, precision medicine, and  
225 ethics. The resulting consensus framework highlights critical areas of focus for precision  
226 medicine research in emergency medicine that are cognizant of the limits and  
227 challenges of data acquisition, the actualization of precision medicine in practice, and  
228 the potential after-effects of this pursuit for our patients and communities. Three major  
229 themes emerged from the modified NGT: values, privacy, and justice.

230

### 231 *Shared Ethical Concerns: Values, Privacy, Justice*

232 A recurring theme in discussion was “whose values are we accounting for?” Participants  
233 acknowledged the sometimes conflicting needs of the individual versus those of the  
234 system. Providers may recommend medications which prolong survival, but side effects  
235 may be undesirable or the cost prohibitive for some patients.<sup>38</sup> The definition of high  
236 quality care envisioned by precision medicine may not align with the individual goals of  
237 patients. There were many questions raised regarding challenges to patient autonomy  
238 and to the ambiguity of who is the ultimate decision maker in precision medicine—and  
239 how that might change over time, as the needs of the many may be at odds with the  
240 needs of a few. The ethical principle of autonomy is considered perhaps the most  
241 important principle in medical ethics.<sup>39</sup> Respect for autonomy requires that patients are

## Ethical Considerations for Precision Emergency Medicine

242 able to make their own decisions, incorporating their own values, but the limits of patient  
243 autonomy remain under debate.<sup>40</sup>

244

245 Ensuring that patient autonomy is maintained can be particularly challenging in the  
246 emergency care context. In the emergency department, providers make decisions with  
247 patients in a time-constrained setting, particularly compared to those historical clinical  
248 environments of precision medicine, such as oncology. Not only does this limit time for  
249 discussion, it may also create a sense of external pressure to make a decision.<sup>41</sup> Might  
250 other competing factors in this clinical setting also ultimately limit patient and physician  
251 choice given precision medicine's reliance on optimizing measurable and scalable  
252 outcomes? The idea of autonomy becomes less clear when it comes to data at the  
253 population level: whose value system will be used to make decisions once data has  
254 moved from the individual care setting to community responsibilities? Will patient values  
255 (e.g., best outcome) align with broader system values (e.g., cost-effectiveness) when  
256 considering precision medicine research and recommendations? To what extent might  
257 patients ultimately lose elements of individual autonomy once their data is incorporated  
258 into communal data?

259

260 This latter concept underscores the importance of privacy in precision medicine.  
261 Confidentiality, a core ethical principle of emergency medicine,<sup>42</sup> requires providers  
262 ensure their patient's privacy. The practice of precision medicine in the emergency  
263 department will likely require massive amounts of data transiting across institutions and  
264 from personal devices. Ensuring the safety and security of this protected information is

## Ethical Considerations for Precision Emergency Medicine

265 a major hurdle for precision medicine initiatives, and the above-mentioned time-  
266 sensitive nature of the emergency department encounter makes it necessary to share  
267 this data in real-time, which is unique from other medical specialties.<sup>43-46</sup> Additionally,  
268 when patients know that the information they provide to the system will be used to make  
269 recommendations for themselves or others, it may have several effects. First, patients  
270 may not accurately disclose their values and personal concerns if they do not have trust  
271 in the safety of their information and its use. For example, alcohol use and history for  
272 the allotment of liver transplant is one area which may leave patients in a moral  
273 quandary, unsure whether to be open with their behavior but fearing the effects of those  
274 disclosures.<sup>47,48</sup> Furthermore, patients may be concerned that their personal choices  
275 may have adverse effects on people like them, providing another ethical dilemma for  
276 how and what to disclose. Privacy includes not only the protection of one's identity and  
277 personal information, but also the ability to make choices without interference.<sup>49</sup>  
278 Perceptions of trustworthiness will impact the success of any scientific or research  
279 endeavor, particularly among historically disadvantaged populations.<sup>50</sup>  
280  
281 But perhaps nowhere is the complex tension between values and privacy felt more than  
282 in the realm of justice. A commitment to justice is in the historical roots of emergency  
283 medicine and it is no surprise that our consensus framework includes this as a key area  
284 for research in precision medicine as it grows in the emergency department and in the  
285 prehospital setting.<sup>51-53</sup> Emergency physicians carry the distinct duty under federal law  
286 to provide care to anyone who presents for emergency care.<sup>54</sup> This duty is widely  
287 recognized to rest on a fundamental moral responsibility to provide care "promptly and

## Ethical Considerations for Precision Emergency Medicine

288 expertly, without prejudice or partiality”.<sup>42</sup> At first it may seem that precision medicine  
289 would help to limit personal biases which might affect care, using data as opposed to  
290 gestalt or local practice variation. But structural biases may encode results and  
291 outcomes on patients that might inadvertently limit the benefits of the precision medicine  
292 model. Obvious examples include the use of race-adjusted creatinine to allocate critical  
293 resources which has occurred for years and affects the validity of results used to make  
294 targeted recommendations.<sup>55</sup>

295  
296 Justice, or more specifically with respect to medical ethics, distributive justice,  
297 emphasizes that resources are to be distributed fairly, equitably, and appropriately. This  
298 can be heavily hindered if providers rely on precision models to make recommendations  
299 without a critical appraisal of how well the results fit the patient in front of them. Even if  
300 done well, the outputs of precision medicine may not be available to all.<sup>56</sup> Precision  
301 medicine which is ultimately only accessible to a few but built on the data of many,  
302 would violate the principle of justice and would be an affront to the growing field of  
303 social emergency medicine. In oncology, an area with a much longer history of precision  
304 medicine, 78% of patients and providers reported concerns regarding the accessibility  
305 of precision medicine.<sup>57</sup>

306  
307

### 308 *Cross-Cutting Themes & the Process of Precision Medicine*

309 Participant discussion emphasized the need to investigate concerns of justice, privacy,  
310 and values from a longitudinal perspective: data acquisition, actualization, and

## Ethical Considerations for Precision Emergency Medicine

311 application after-effects. In doing so, additional cross cutting themes emerged  
312 (Supplemental Table 1), many of which are shared with other applications of precision  
313 medicine.

314

### 315 Data Availability and Acquisition

316 Ultimately, the trust patients and providers have in the recommendations of precision  
317 medicine begins with the data that are used and collected. In emergency medicine, we,  
318 as providers, stand prepared to address a range of conditions for any patient, at any  
319 time. However, we often cannot rely on complete patient histories (e.g., due to the  
320 severity of illness or mental status changes frequently encountered in emergency  
321 medicine) or access to prior medical records (e.g., our patients may be uninsured,  
322 underinsured, and without access to routine primary care providers.<sup>58</sup> Precision  
323 medicine approaches will thus need to be deployable in a timely manner and require  
324 only what limited patient-specific information is available to emergency physicians.

325

326 Furthermore, even when data are available, precision medicine approaches may serve  
327 only to perpetuate systemic flaws in the healthcare system if the data used is  
328 inaccurate, biased, or exclusionary from the start.<sup>7,59</sup> Data may reflect bias with respect  
329 to inclusion<sup>60</sup> as well as bias stemming from structural racism. A 12-year review of the  
330 National Hospital Ambulatory Medical Survey (NHAMCS) showed that Black patients in  
331 the emergency department were 10% less likely to receive immediate or emergent  
332 Emergency Severity Index (ESI) scores compared to white patients, 10% less likely  
333 than white patients to be admitted, but 1.26 more likely to die in the emergency

## Ethical Considerations for Precision Emergency Medicine

334 department or the hospital than white patients.<sup>58</sup> If these data were used to make  
335 recommendations about who and where to direct resources, it may serve only to further  
336 amplify the pre-existing failures to address and reduce bias that are present in the data  
337 and its acquisition.

338

### 339 Choice

340 Beyond the issue of timing, there are additional logistic concerns for the actualization of  
341 precision medicine in emergency departments, including costs, legal issues and patient  
342 education. Efforts made to collate data from emergency care settings to be used in  
343 precision medicine research may result in products or treatment pathways unaffordable  
344 to these patients.<sup>61–63</sup> This may be mitigated through insurers,<sup>64</sup> but the emergency  
345 department is a safety net, and as such this approach may not benefit the most  
346 vulnerable patients while those who are insured may find that their plans have little  
347 incentive to offer this option.<sup>65</sup> Research has shown that the cost of precision medicine  
348 is a concern shared by patients and providers alike.<sup>56,57</sup>

349

### 350 Informed Decision Making

351 Even when payment is not an issue, a data- and machine-supported approach may not  
352 be conducive to truly informed consent given the limitations of adequately educating  
353 emergency department patients regarding how precision medicine and its associated  
354 research works.<sup>56,66</sup> Beyond the challenge of consenting in the emergency context,  
355 providers must also consider issues regarding disclosing incidental information and the  
356 potential changes associated with the use of data over time which interconnected to

## Ethical Considerations for Precision Emergency Medicine

357 other growing datasets. Stewardship of these data, defined as “the responsible  
358 management of something entrusted to one’s care”,<sup>67</sup> will be critical to maintaining trust  
359 of patients and communities as this science evolves.<sup>50</sup>

360

### 361 Avoiding Reductionism

362 Despite the promise of precision medicine to deliver individually tailored care, it, like  
363 traditional approaches, requires that patients be categorized into discrete groups by  
364 some shared characteristics. The choice of categories and the act of assigning patients  
365 to these groups has its own meaning and implications.<sup>4</sup>

366

367 Discussion in this NGT process highlighted the need to actively maintain a holistic view  
368 of the patient without being overly reductive to these categories. Currently, only a limited  
369 amount of data are collected with respect to health measures or lab studies, and even  
370 less is recorded for social determinants of health. Future work is needed to better  
371 incorporate environmental and social factors into precision medicine models to better  
372 delineate the contribution of these critical factors to emergency medicine presentations,  
373 outcomes, and recommendations for care.

374

### 375 *Limitations*

376 While NGT aims to limit the biases associated with other consensus models, expertise  
377 bias is still a potential limitation of this study, given that all participants were aware of  
378 and knowledgeable on this topic beforehand. However, we took several steps to limit its  
379 impact. NGT, by way of its structured format, is meant to limit the influence of any one

## Ethical Considerations for Precision Emergency Medicine

380 dominant individual in discussion.<sup>37</sup> Further, we included a diverse spectrum of  
381 emergency physicians from residents to attending physicians with varying years of  
382 experience, as well as emergency physicians with a variety of subspecialty training.  
383 While the number of participants enrolled is in the ideal range for an NGT,<sup>24</sup>  
384 nevertheless, the number of participants is small and future research could benefit from  
385 additional strategies that would incorporate a higher number of emergency physicians  
386 and experts from outside of the field which might offer perspective to our work.

387

388

### 389 *Conclusions*

390 In summary, realizing the promise of precision medicine's "right person, right place, right  
391 time" must be balanced by the context of the "anyone, anywhere, any time" of  
392 emergency medicine. Our work has illuminated a range of concerns for the  
393 development of precision emergency medicine, and provides a focused framework for  
394 the most pressing ethical considerations along the continuum of data acquisition to  
395 implementation. This framework may be used to direct research and innovation toward  
396 addressing these challenges in the emergency medicine setting.

397

398

399



## Ethical Considerations for Precision Emergency Medicine

400

### 401 **References:**

- 402 1. Salari P, Larijani B. Ethical Issues Surrounding Personalized Medicine: A Literature  
403 Review. *Acta Med Iran*. 2017;55(3):209-217.
- 404 2. Liu X, Luo X, Jiang C, Zhao H. Difficulties and challenges in the development of precision  
405 medicine. *Clin Genet*. 2019;95(5):569-574.
- 406 3. Sitapati A, Kim H, Berkovich B, et al. Integrated precision medicine: the role of electronic  
407 health records in delivering personalized treatment. *Wiley Interdiscip Rev Syst Biol Med*.  
408 2017;9(3). doi:10.1002/wsbm.1378
- 409 4. Seymour CW, Gomez H, Chang CCH, et al. Precision medicine for all? Challenges and  
410 opportunities for a precision medicine approach to critical illness. *Crit Care*. 2017;21(1):257.
- 411 5. Mensah GA, Jaquish C, Srinivas P, et al. Emerging Concepts in Precision Medicine and  
412 Cardiovascular Diseases in Racial and Ethnic Minority Populations. *Circ Res*.  
413 2019;125(1):7-13.
- 414 6. Lee SSJ, Fullerton SM, Saperstein A, Shim JK. Ethics of inclusion: Cultivate trust in  
415 precision medicine. *Science*. 2019;364(6444):941-942.
- 416 7. Geneviève LD, Martani A, Shaw D, Elger BS, Wangmo T. Structural racism in precision  
417 medicine: leaving no one behind. *BMC Med Ethics*. 2020;21(1):17.
- 418 8. Stein JN, Charlot M, Cykert S. Building Toward Antiracist Cancer Research and Practice:  
419 The Case of Precision Medicine. *JCO Oncol Pract*. 2021;17(5):273-277.
- 420 9. Goetz LH, Schork NJ. Personalized medicine: motivation, challenges, and progress. *Fertil*  
421 *Steril*. 2018;109(6):952-963.
- 422 10. Elemento O. The future of precision medicine: towards a more predictive personalized  
423 medicine. *Emerg Top Life Sci*. 2020;4(2):175-177.
- 424 11. Hill-Briggs F, Adler NE, Berkowitz SA, et al. Social Determinants of Health and Diabetes: A  
425 Scientific Review. *Diabetes Care*. Published online November 2, 2020. doi:10.2337/dci20-  
426 0053
- 427 12. Marmot M, Allen JJ. Social determinants of health equity. *Am J Public Health*. 2014;104  
428 Suppl 4:S517-S519.
- 429 13. Kalra D. The importance of real-world data to precision medicine. *Per Med*. 2019;16(2):79-  
430 82.
- 431 14. Hollister B, Bonham VL. Should Electronic Health Record-Derived Social and Behavioral  
432 Data Be Used in Precision Medicine Research? *AMA J Ethics*. 2018;20(9):E873-E880.
- 433 15. Sukumar SR, Natarajan R, Ferrell RK. Quality of Big Data in health care. *Int J Health Care*  
434 *Qual Assur*. 2015;28(6):621-634.
- 435 16. Desharnais S. Current Uses of Large Data Sets to Assess the Quality of Providers:  
436 Construction of Risk-Adjusted Indexes of Hospital Performance. *Int J Technol Assess*

## Ethical Considerations for Precision Emergency Medicine

- 437        *Health Care*. 1990;6(2):229-238.
- 438        17. Williams WW, Hogan JW, Ingelfinger JR. Time to Eliminate Health Care Disparities in the  
439        Estimation of Kidney Function. *N Engl J Med*. 2021;385(19):1804-1806.
- 440        18. Wiens J, Saria S, Sendak M, et al. Do no harm: a roadmap for responsible machine  
441        learning for health care. *Nat Med*. 2019;25(9):1337-1340.
- 442        19. Char DS, Shah NH, Magnus D. Implementing Machine Learning in Health Care —  
443        Addressing Ethical Challenges. *New England Journal of Medicine*. 2018;378(11):981-983.  
444        doi:10.1056/nejmp1714229
- 445        20. Owens K, Walker A. Those designing healthcare algorithms must become actively anti-  
446        racist. *Nat Med*. 2020;26(9):1327-1328.
- 447        21. Rajkomar A, Hardt M, Howell MD, Corrado G, Chin MH. Ensuring Fairness in Machine  
448        Learning to Advance Health Equity. *Ann Intern Med*. 2018;169(12):866-872.
- 449        22. Marcozzi D, Carr B, Liferidge A, Baehr N, Browne B. Trends in the Contribution of  
450        Emergency Departments to the Provision of Hospital-Associated Health Care in the USA.  
451        *Int J Health Serv*. 2018;48(2):267-288.
- 452        23. Hsia RY, Sabbagh SH, Guo J, Nuckton TJ, Niedzwiecki MJ. Trends in the utilisation of  
453        emergency departments in California, 2005–2015: a retrospective analysis. *BMJ Open*.  
454        2018;8(7):e021392.
- 455        24. McMillan SS, King M, Tully MP. How to use the nominal group and Delphi techniques. *Int J*  
456        *Clin Pharm*. 2016;38(3):655-662.
- 457        25. Ranney ML, Fletcher J, Alter H, et al. A Consensus-Driven Agenda for Emergency  
458        Medicine Firearm Injury Prevention Research. *Ann Emerg Med*. 2017;69(2):227-240.
- 459        26. Elder E, Johnston AN, Byrne JH, Wallis M, Crilly J. Core components of a staff wellness  
460        strategy in emergency departments: A clinician-informed nominal group study. *Emerg Med*  
461        *Australas*. 2021;33(1):25-33.
- 462        27. Nik Hisamuddin R, Tuan Hairulnizam TK. Developing Key Performance Indicators for  
463        Emergency Department of Teaching Hospitals: A Mixed Fuzzy Delphi and Nominal Group  
464        Technique Approach. *Malays J Med Sci*. 2022;29(2):114-125.
- 465        28. Peltzer-Jones J, Nordstrom K, Currier G, Berlin JS, Singh C, Schneider S. A Research  
466        Agenda for Assessment and Management of Psychosis in Emergency Department  
467        Patients. *West J Emerg Med*. 2019;20(2):403-408.
- 468        29. Members of the SAEM Consensus Conference Emergency Medical Services  
469        Subcommittee, Adalgais KM, Hansen M, et al. Establishing the key outcomes for pediatric  
470        emergency medical services research. *Acad Emerg Med*. 2018;25(12):1345-1354.
- 471        30. Marynowski-Traczyk D, Wallis M, Broadbent M, et al. Optimising emergency department  
472        and acute care for people experiencing mental health problems: a nominal group study.  
473        *Aust Health Rev*. 2022;46(5):519-528.
- 474        31. Safdar B, Greenberg MR. Organization, execution and evaluation of the 2014 Academic

## Ethical Considerations for Precision Emergency Medicine

- 475 Emergency Medicine consensus conference on Gender-Specific Research in Emergency  
476 Care - an executive summary. *Acad Emerg Med*. 2014;21(12):1307-1317.
- 477 32. Harvey N, Holmes CA. Nominal group technique: an effective method for obtaining group  
478 consensus. *Int J Nurs Pract*. 2012;18(2):188-194.
- 479 33. Kottmann A, Krüger AJ, Sunde GA, et al. Establishing quality indicators for pre-hospital  
480 advanced airway management: a modified nominal group technique consensus process. *Br*  
481 *J Anaesth*. 2022;128(2):e143-e150.
- 482 34. Sunde GA, Kottmann A, Heltne JK, et al. Standardised data reporting from pre-hospital  
483 advanced airway management - a nominal group technique update of the Utstein-style  
484 airway template. *Scand J Trauma Resusc Emerg Med*. 2018;26(1):46.
- 485 35. Nelson V, Dubov A, Morton K, Fraenkel L. Using nominal group technique among resident  
486 physicians to identify key attributes of a burnout prevention program. *PLoS One*.  
487 2022;17(3):e0264921.
- 488 36. Gallagher M, Hares T, Spencer J, Bradshaw C, Webb I. The nominal group technique: a  
489 research tool for general practice? *Fam Pract*. 1993;10(1):76-81.
- 490 37. Humphrey-Murto S, Varpio L, Gonsalves C, Wood TJ. Using consensus group methods  
491 such as Delphi and Nominal Group in medical education research. *Med Teach*.  
492 2017;39(1):14-19.
- 493 38. Kelly TD, Hawk KF, Samuels EA, Strayer RJ, Hoppe JA. Improving Uptake of Emergency  
494 Department-initiated Buprenorphine: Barriers and Solutions. *West J Emerg Med*.  
495 2022;23(4):461-467.
- 496 39. Sedig L. What's the Role of Autonomy in Patient- and Family-Centered Care When Patients  
497 and Family Members Don't Agree? *AMA Journal of Ethics*. 2016;18(1):12-17.
- 498 40. Entwistle VA, Carter SM, Cribb A, McCaffery K. Supporting patient autonomy: the  
499 importance of clinician-patient relationships. *J Gen Intern Med*. 2010;25(7):741-745.
- 500 41. Naess AC, Foerde R, Steen PA. Patient autonomy in emergency medicine. *Med Health*  
501 *Care Philos*. 2001;4(1):71-77.
- 502 42. American College of Emergency Physicians. Code of ethics for emergency physicians. *Ann*  
503 *Emerg Med*. 2008;52(5):581-590.
- 504 43. Lee SSJ, Cho MK, Kraft SA, et al. "I don't want to be Henrietta Lacks": diverse patient  
505 perspectives on donating biospecimens for precision medicine research. *Genet Med*.  
506 2018;21(1):107-113.
- 507 44. Ratcliff CL, Kaphingst KA, Jensen JD. When Personal Feels Invasive: Foreseeing  
508 Challenges in Precision Medicine Communication. *J Health Commun*. 2018;23(2):144-152.
- 509 45. Stiles D, Appelbaum PS. Cases in Precision Medicine: Concerns About Privacy and  
510 Discrimination After Genomic Sequencing. *Ann Intern Med*. 2019;170(10):717-721.
- 511 46. Sankar PL, Parker LS. The Precision Medicine Initiative's All of Us Research Program: an  
512 agenda for research on its ethical, legal, and social issues. *Genet Med*. 2016;19(7):743-

## Ethical Considerations for Precision Emergency Medicine

- 513 750.
- 514 47. Moss AH, Siegler M. Should alcoholics compete equally for liver transplantation? *JAMA*.  
515 1991;265(10):1295-1298.
- 516 48. Sedki M, Ahmed A, Goel A. Ethical and allocation issues in liver transplant candidates with  
517 alcohol related liver disease. *Transl Gastroenterol Hepatol*. 2022;7:26.
- 518 49. Geiderman JM, Moskop JC, Derse AR. Privacy and confidentiality in emergency medicine:  
519 obligations and challenges. *Emerg Med Clin North Am*. 2006;24(3):633-656.
- 520 50. Kraft SA, Cho MK, Gillespie K, et al. Beyond Consent: Building Trusting Relationships With  
521 Diverse Populations in Precision Medicine Research. *Am J Bioeth*. 2018;18(4):3-20.
- 522 51. Zink BJ. Social justice, egalitarianism, and the history of emergency medicine. *Virtual*  
523 *Mentor*. 2010;12(6):492-494.
- 524 52. Anderson ES, Lippert S, Newberry J, Bernstein E, Alter HJ, Wang NE. Addressing Social  
525 Determinants of Health from the Emergency Department through Social Emergency  
526 Medicine. *West J Emerg Med*. 2016;17(4):487-489.
- 527 53. Ben-Assuli O. Electronic health records, adoption, quality of care, legal and privacy issues  
528 and their implementation in emergency departments. *Health Policy*. 2015;119(3):287-297.
- 529 54. Brown HL, Brown TB. EMTALA: The Evolution of Emergency Care in the United States. *J*  
530 *Emerg Nurs*. 2019;45(4):411-414.
- 531 55. Boulware LE, Purnell TS, Mohottige D. Systemic Kidney Transplant Inequities for Black  
532 Individuals: Examining the Contribution of Racialized Kidney Function Estimating  
533 Equations. *JAMA Netw Open*. 2021;4(1):e2034630.
- 534 56. Erdmann A, Rehmann-Sutter C, Bozzaro C. Patients' and professionals' views related to  
535 ethical issues in precision medicine: a mixed research synthesis. *BMC Med Ethics*.  
536 2021;22(1):116.
- 537 57. Miller AM, Garfield S, Woodman RC. Patient and provider readiness for personalized  
538 medicine. *Pers Med Oncol*.
- 539 58. Zhang X, Carabello M, Hill T, Bell SA, Stephenson R, Mahajan P. Trends of Racial/Ethnic  
540 Differences in Emergency Department Care Outcomes Among Adults in the United States  
541 From 2005 to 2016. *Front Med*. 2020;7:300.
- 542 59. Mersha TB, Abebe T. Self-reported race/ethnicity in the age of genomic research: its  
543 potential impact on understanding health disparities. *Hum Genomics*. 2015;9:1.
- 544 60. Manrai AK, Patel CJ, Ioannidis JPA. In the Era of Precision Medicine and Big Data, Who Is  
545 Normal? *JAMA*. 2018;319(19):1981-1982.
- 546 61. O'Sullivan BP, Orenstein DM, Milla CE. Pricing for orphan drugs: will the market bear what  
547 society cannot? *JAMA*. 2013;310(13):1343-1344.
- 548 62. Ferkol T, Quinton P. Precision Medicine: At What Price? *Am J Respir Crit Care Med*.  
549 2015;192(6):658-659.

## Ethical Considerations for Precision Emergency Medicine

- 550 63. Ramaswami R, Bayer R, Galea S. Precision Medicine from a Public Health Perspective.  
551 *Annu Rev Public Health*. 2018;39:153-168.
- 552 64. Geruso M, Jena AB, Layton TJ. Will Personalized Medicine Mean Higher Costs for  
553 Consumers? *Harvard Business Review*. Published online March 1, 2018. Accessed  
554 October 27, 2022. [https://hbr.org/2018/03/will-personalized-medicine-mean-higher-costs-](https://hbr.org/2018/03/will-personalized-medicine-mean-higher-costs-for-consumers)  
555 [for-consumers](https://hbr.org/2018/03/will-personalized-medicine-mean-higher-costs-for-consumers)
- 556 65. Horgan D, Jansen M, Leyens L, et al. An index of barriers for the implementation of  
557 personalised medicine and pharmacogenomics in Europe. *Public Health Genomics*.  
558 2014;17(5-6):287-298.
- 559 66. Fiore RN, Goodman KW. Precision medicine ethics: selected issues and developments in  
560 next-generation sequencing, clinical oncology, and ethics. *Curr Opin Oncol*. 2016;28(1):83-  
561 87.
- 562 67. Fullerton SM, Anderson NR, Guzauskas G, Freeman D, Fryer-Edwards K. Meeting the  
563 governance challenges of next-generation biorepository research. *Sci Transl Med*.  
564 2010;2(15):15cm3.
- 565

## Ethical Considerations for Precision Emergency Medicine

566 Figure Legends

567 Figure 1: Flow chart of the NGT process.

568

569 [Figure 2](#): Priority matrix of ethical concerns for precision medicine.

570

571

## Ethical Considerations for Precision Emergency Medicine

572

| Initials | Specialty                        | Level of Training | Practice Setting                                          |
|----------|----------------------------------|-------------------|-----------------------------------------------------------|
| AF       | Emergency, Pediatrics            | Attending, Early  | Academic Center, County Hospital                          |
| TD       | Emergency, Education             | Attending, Early  | Academic Center, Community Hospital                       |
| DW       | Emergency, Pediatrics, Education | Attending, Mid    | Academic Center, County Hospital                          |
| DH       | Emergency                        | Resident          | Academic Center, County Hospital, Integrated Managed Care |
| SC       | Emergency                        | Resident          | Academic Center, County Hospital, Integrated Managed Care |
| DD       | Emergency, Informatics           | Fellow            | Academic Center, Veterans Affairs (VA)                    |
| EI       | Emergency, Ethics                | Attending, Late   | Academic Center, County Hospital                          |
| LS       | Emergency, Education             | Attending, Early  | Academic Center, Integrated Managed Care                  |
| NP       | Emergency                        | Resident          | Academic Center, County Hospital, Integrated Managed Care |
| SM       | Emergency                        | Resident          | Academic Center, County Hospital, Integrated Managed Care |
| GT       | Emergency                        | Attending, Early  | Community Hospital                                        |
| MD       | Emergency                        | Resident          | Academic Center, County Hospital, Integrated Managed Care |

573 Appendix Table 1: Nominal Group participant specialty and level of training.

574

575

| Participant 1                                                                                    |
|--------------------------------------------------------------------------------------------------|
| Complicating payer structures (things getting more expensive without getting anything out of it) |
| Differential treatment across institutions                                                       |

## Ethical Considerations for Precision Emergency Medicine

|                                                                                                                                                                             |
|-----------------------------------------------------------------------------------------------------------------------------------------------------------------------------|
| Things getting more expensive                                                                                                                                               |
| Proper systems in place for error reporting and monitoring                                                                                                                  |
| Weight issues across institutions ([Institution X] does genetics, so [their] precision is going to be about genetics, vs. another institution might have a tox focus, etc.) |
| Privacy concerns when cohorting patients - who is similar and who is not? determining that                                                                                  |
| Provider comfort with deployment of differential treatment strategies                                                                                                       |
| Difficulty in ensuring equitable across multiple groups                                                                                                                     |
| <b>Participant 2</b>                                                                                                                                                        |
| Family history / genetic predisposition concerns* - example opiates                                                                                                         |
| Inability to pay (offer to a patient or not, if you know they can't pay)                                                                                                    |
| <b>Participant 3</b>                                                                                                                                                        |
| What prevents companies from researching the most common (lucrative) condition and focusing on this                                                                         |
| Where is the border between privacy and less private for the benefit of hoping interventions will be tailored to you                                                        |
| Is practicing different medicine on different patients fair? just? what language do we use here                                                                             |
| How to navigate between deviant phenotypes and societal/envt barriers that disable people                                                                                   |
| How to incorporate everyone into precision research (barriers to informed consent)                                                                                          |
| Are people just going to share their data to be unwillingly fixed                                                                                                           |
| Are you losing the power to make decisions about how to manage your own differences                                                                                         |
| How to capture social determinants of health? Do we capture them?                                                                                                           |
| How accurate is the medical record in representing entities?                                                                                                                |
| <b>Participant 4</b>                                                                                                                                                        |
| Difficulties remaining current                                                                                                                                              |
| Providers anchoring on past determinations (correctly or incorrectly)                                                                                                       |
| A number of disparities that would make it hard to participate (financial, housing, recent immigrants, without PCP)                                                         |
| Lacking information about how genetics change over time?                                                                                                                    |
| Issues transferring information between health systems and health record systems                                                                                            |
| How much does lifestyle matter?                                                                                                                                             |
| Issues incidental findings and follow-up                                                                                                                                    |



## Ethical Considerations for Precision Emergency Medicine

|                                                                                                                                                                            |
|----------------------------------------------------------------------------------------------------------------------------------------------------------------------------|
| Do we have a lens of prevention vs just acute medical conditions?                                                                                                          |
| Who is going to fund the research (response to opiates* example) - historical studies                                                                                      |
| <b>Participant 5</b>                                                                                                                                                       |
| What are we going to do around minors, is this going to be shared with guardians                                                                                           |
| Flawed data going in will lead to flawed data going out                                                                                                                    |
| Data sharing among institutions EMRs that speak to each other                                                                                                              |
| Who will pay? individual vs societal - extreme cost of care already                                                                                                        |
| How are we measuring precision medicine from a quality lens (how do we know we are doing it right/well)                                                                    |
| <b>Participant 6</b>                                                                                                                                                       |
| If we think social determinants of health are inputs, are patient values inputs?                                                                                           |
| Privacy is a concern                                                                                                                                                       |
| <b>Participant 7</b>                                                                                                                                                       |
| Oversampling some populations and undersampling others                                                                                                                     |
| Opportunity further racist ideology and marginalize patients - race is genetic and biologic is one argument in our country                                                 |
| Will precision-medicine be the same for diagnoses and populations                                                                                                          |
| Expensive                                                                                                                                                                  |
| How to decide what disease conditions to study and treat?                                                                                                                  |
| Will who we decide to study and treat have unintended consequences?                                                                                                        |
| What if we are wrong (precision medicine is wrong)?                                                                                                                        |
| Reducing our patients to a few factors and not holistic human -- harmful to patient and doctor                                                                             |
| How are we going to teach it?                                                                                                                                              |
| Will all programs have access to a person who can teach this?                                                                                                              |
| What about getting the right treatment for patients is not right for that human - "recommendation of admission". Can precision medicine pivot? if not inline with patients |
| Will non-precision medicine be available to patients or do they have to do precision-medicine pathway                                                                      |
| <b>Participant 8</b>                                                                                                                                                       |
| How will genetic info be collected, stored, maintained? who will be accountability to this                                                                                 |
| Who will be accountable for the collected information                                                                                                                      |
| Provider- do we know how to interpret this information and does that change in an emergent scenario                                                                        |

## Ethical Considerations for Precision Emergency Medicine

|                                                                                                                    |
|--------------------------------------------------------------------------------------------------------------------|
| Does how we interpret PEM change in an emergent scenario                                                           |
| Equity - how do we include underrepresented or excluded groups in a way that avoids surveillance                   |
| What will corporate influence in this area be?                                                                     |
| Can different care still be equitable "separate but equal" in outcomes?                                            |
| Can perception of different care still be equitable                                                                |
| How do we maintain humility as we learn more about genetics and epigenetics?                                       |
| <b>Participant 9</b>                                                                                               |
| Should we be investing in PEM when many have no access to care                                                     |
| Will insurance companies access this info and use it against you                                                   |
| Unintended psychological consequences (person knows they will get a disease, lives in fear)                        |
| Mistrust of people/system                                                                                          |
| Parents consent on behalf of their child and they never wanted to know?                                            |
| Potential lawsuits                                                                                                 |
| <b>Participant 10</b>                                                                                              |
| Patient interface with own medical information and ability to interpret and apply this information                 |
| Gender issues? identity issues?                                                                                    |
| How do we ascribe value to different educational choices and the ways they impact their health care                |
| The discoverability and legal proceeding have more information and how that impacts insurance/legality             |
| Who owns this data?                                                                                                |
| How can we make it safe while also making it accessible                                                            |
| Accuracy in obtaining demographic information (is patient listing this or someone else assigning it)               |
| <b>Participant 11</b>                                                                                              |
| How do you make sure goals of precision medicine are not being changed when going from hospital—>provider—>patient |
| How do we keep the interest of patient first                                                                       |
| How do we present ideas in a way that everyone can understand?                                                     |
| Feedback. How do we make systems adaptable over time                                                               |
| How do we keep patient's choices in precision-medicine                                                             |

## Ethical Considerations for Precision Emergency Medicine

|                                                                                                            |
|------------------------------------------------------------------------------------------------------------|
| How do we keep the personalization in precision medicine                                                   |
| Social determinants: gender, financial, socially. How do we communicate this?                              |
| <b>Participant 12</b>                                                                                      |
| How do we make judgements on what is most important to prioritize                                          |
| Doctors are humans too and may have judgements and values that may conflict with patients                  |
| Trust generally requires relationship built over time and how do we do that in the ED                      |
| Feedback from EM to PCP and vice versa                                                                     |
| Genetic risk factors vs modifiable or behavioral risk factors and how to play in care                      |
| Through patient education how can we strategize to engage historically hesitant groups from participation? |

576 Appendix Table 2: Complete list of questions generated by participants in steps one and two.

577

578

|                                                                        |
|------------------------------------------------------------------------|
| <b>CROSS-CUTTING THEMES</b>                                            |
| How accurate is the data used for precision medicine?                  |
| How will payment for precision medicine be structured?                 |
| Who will have access to precision medicine?                            |
| How are we going to educate providers, patients, and the public?       |
| Will all institutions have the capability to teach precision medicine? |
| Will information be transferable between health care systems?          |
| How do we keep the interests of the patient first?                     |
| How do insurance and corporate interests fit into the model?           |

579 Appendix Table 1: Cross-Cutting Themes

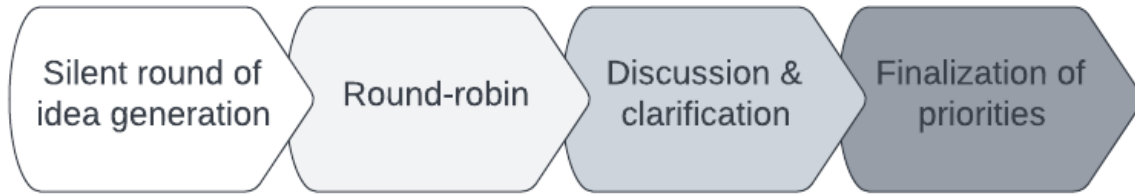

|               | Values                                                      | Privacy                                                 | Justice                                            |
|---------------|-------------------------------------------------------------|---------------------------------------------------------|----------------------------------------------------|
|               | (Complete list in Table 1)                                  | (Complete list in Table 2)                              | (Complete list in Table 3)                         |
| Acquisition   | Who decides what to include in data sets?                   | How will data be collected and maintained?              | Will some populations be over- or under-sampled?   |
| Actualization | Do patients get to choose what treatment is right for them? | Will patients lose the power to make private decisions? | Will precision medicine be available to everyone?  |
| After-Effect  | Who determines if we made the right choice?                 | Can data be re-identified later?                        | Can we ensure equitable distribution of resources? |

Table 3: Participant concerns about how to ensure just care in the precision medicine model and process.

|                                                                                                            |
|------------------------------------------------------------------------------------------------------------|
| <b>JUSTICE</b>                                                                                             |
| <i>Acquisition</i>                                                                                         |
| Will some populations be oversampled while others are undersampled?                                        |
| Will those who are historically excluded continue to be excluded?                                          |
| Is variation in historic data due to patient phenotype or societal and environmental effects?              |
| How do we incorporate everyone into precision research (barriers to informed consent)?                     |
| Can perception of different care still be equitable?                                                       |
| What are the disparities that would make it hard for patients to participate?                              |
| Should we be investing in precision medicine when many currently have no access to care?                   |
| Who is going to fund the research?                                                                         |
| How are precision medicine priorities determined (i.e., institutional level or government level)?          |
| What about patients who cannot pay for precision medicine?                                                 |
| <i>Actualization</i>                                                                                       |
| How do we build a relationship of trust with a patient in the ED?                                          |
| How do we keep the personalization in precision medicine?                                                  |
| How do we ensure data sharing can occur among differing institutions or electronic medical record systems? |
| How can we make precision medicine safe while also making it accessible?                                   |
| How do we prevent genetic predispositions from leading to biased care (i.e., genetic determinism)?         |
| <i>After-effects</i>                                                                                       |
| Will flawed data inputs result in flawed data outputs?                                                     |
| How do we make systems adaptable over time?                                                                |
| How does the medical system analyze implementation and ensure outcome is fed back into the system?         |
| Can we ensure precision medicine is equitable across all patient populations?                              |
| What systems need to be in place for error monitoring and reporting?                                       |

Will who we decide to study and treat have unintended consequences?

Will this further racist ideologies and marginalize patients?

Table 2: Participant concerns regarding privacy in the precision medicine process.

| <b>PRIVACY</b>                                                                                                            |
|---------------------------------------------------------------------------------------------------------------------------|
| <i>Acquisition</i>                                                                                                        |
| Who will be accountable for the collected information?                                                                    |
| How will genetic information be collected, stored, maintained?                                                            |
| How do we protect minors while ensuring appropriate data sharing with their caregivers?                                   |
| How do we decide which of many possible variables to include?                                                             |
| How do we include underrepresented or excluded groups in a way that avoids perception of surveillance?                    |
| <i>Actualization</i>                                                                                                      |
| How large of a concern is privacy?                                                                                        |
| Will patients lose the power to make private decisions about how to manage their own situation?                           |
| How will patients interface with additional personal medical data?                                                        |
| What happens with incidental findings and how does the medical community ensure appropriate follow-up for these findings? |
| <i>After-effects</i>                                                                                                      |
| Can data be re-identified due to cohorting rare conditions?                                                               |
| What are the legal ramifications (i.e., at higher risk for medical malpractice)?                                          |
| At what point does data sharing and access become a privacy concern?                                                      |
| Who owns the shared data?                                                                                                 |



Table 1: Participant concerns related to how the unique values of patients, providers, and the healthcare system will be incorporated into precision medicine.

| <b>VALUES</b>                                                                                                                              |
|--------------------------------------------------------------------------------------------------------------------------------------------|
| <i>Acquisition</i>                                                                                                                         |
| What if individuals identify differently from measures used in precision medicine?                                                         |
| How accurate is the medical record in representing the individual?                                                                         |
| Should individuals worry about the impact of family history/genetic predisposition?                                                        |
| How much does lifestyle matter?                                                                                                            |
| How will social determinants of health be evaluated?                                                                                       |
| How do we decide what disease conditions to study and treat?                                                                               |
| Can we mitigate the mistrust of people/system?                                                                                             |
| How do we present precision medicine in a way that everyone can understand?                                                                |
| What do we do if healthcare providers have judgements and values that may conflict with patients' judgements and values?                   |
| How accurate will the obtained demographic information be?                                                                                 |
| How are genetic risk factors versus modifiable or behavioral risk factors differentiated and how will this impact precision medicine care? |
| <i>Actualization</i>                                                                                                                       |
| Is reducing our patients to a few factors harmful to the patient or the patient/physician relationship?                                    |
| How do we maintain humility as we learn more about genetics and epigenetics?                                                               |
| How do we address patient choice?                                                                                                          |
| What prevents companies from researching the most common (lucrative) condition?                                                            |
| Will non-precision medicine be available to patients even with precision medicine?                                                         |
| How do we maintain patient choice in precision medicine?                                                                                   |
| Are patient values a major determinant? How do we measure this?                                                                            |
| Does how we utilize precision medicine change in an emergent scenario?                                                                     |
| Do patients get a choice in whether precision medicine is "right" for them?                                                                |
| How do healthcare providers stay up-to-date with rapid changes in precision medicine?                                                      |

|                                                                                                                                              |
|----------------------------------------------------------------------------------------------------------------------------------------------|
| How do we assign value to people's choices and how this impacts health?                                                                      |
| Would patients lose the power to make decisions about how to manage their own differences?                                                   |
| On a medical provider level, do we know how to interpret precision medicine data and does the interpretation change in an emergent scenario? |
| Is it possible that medical providers will anchor on past determinations (correctly or incorrectly)?                                         |
| How do we ensure provider comfort with using precision medicine?                                                                             |
| Does precision medicine capture the holistic patient experience?                                                                             |
| <i>After-effects</i>                                                                                                                         |
| What if we are wrong (precision medicine is wrong)?                                                                                          |
| Are there unintended psychological consequences?                                                                                             |
| How do we know that we are "getting it right" from a quality perspective?                                                                    |
| How do we ascribe value to different patient choices and the ways the choices impact their health care?                                      |
| How do we ensure patient choice and preference is communicated between medical teams?                                                        |
